# Supplementary material for: Silencing Bcl-2 Expression in Epithelial Cancer Cells Using “Smart” Particles
Source: MDPI journal article supplement (doi:10.3390/jfb5030167), 2014-09-16
Supplement: s1 [file s1]

## Supplementary Information

**Figure S1.** (A) The  $^1\text{H}$ -NMR spectrum of P(EAA-*co*-BMA) copolymer in DMSO- $\text{d}_6$ ; (B) the  $^1\text{H}$ -NMR spectrum of P(EAA-*co*-BMA)-*b*-PNASI copolymer in DMSO- $\text{d}_6$ ; (C) the  $^1\text{H}$ -NMR spectrum of P(EAA-*co*-BMA)-*b*-PNASI-*g*-P(HMA-*co*-TMAEMA) comb-like polymer in  $\text{D}_2\text{O}$ .

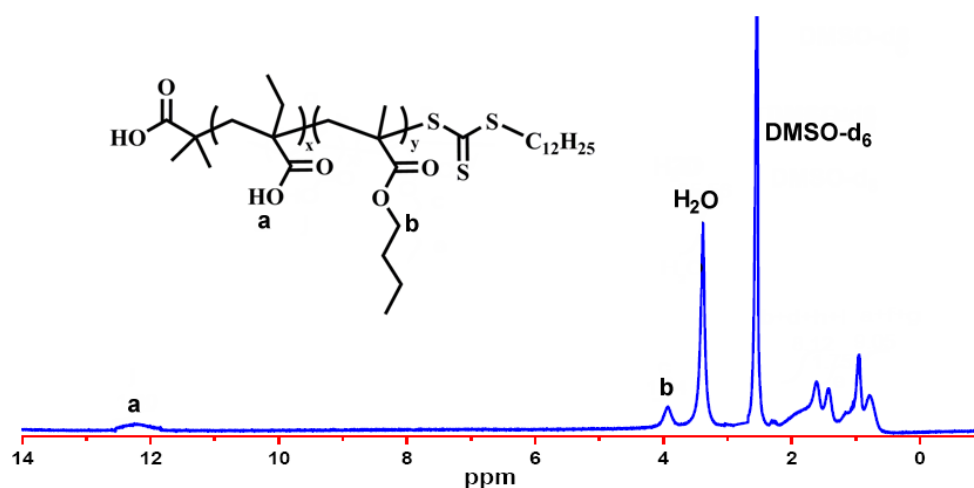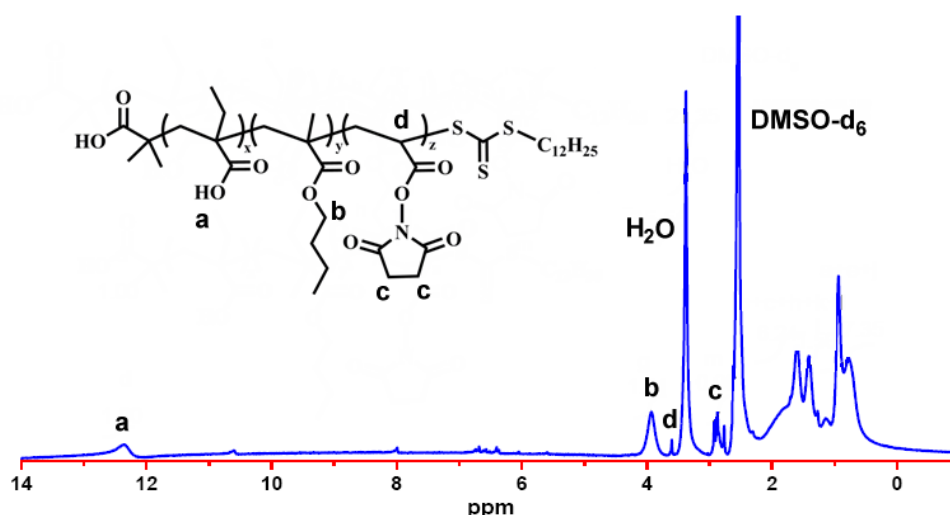

Figure S1. *Cont.*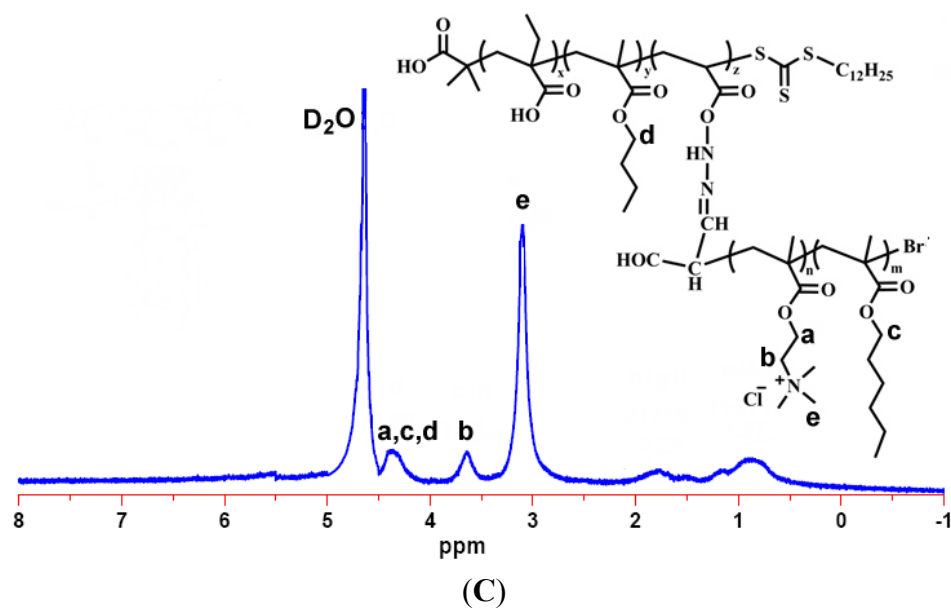

© 2014 by the authors; licensee MDPI, Basel, Switzerland. This article is an open access article distributed under the terms and conditions of the Creative Commons Attribution license (<http://creativecommons.org/licenses/by/3.0/>).
